# Supplementary material
Source: PubMed Central journal article supplement (PMC2948988)
Supplement: pp.110.162214_2.pdf [file pp.110.162214_2.pdf]

**Supplementary Table S1a**

| OS02g48720 | Poisson Coefficient | Std. Error | z value | Pr(> z ) |
|------------|---------------------|------------|---------|----------|
| Dry        | 100                 | 0          | 0       | 0        |
| Nit        | 74.22               | 32.29      | -0.798  | 0.425    |
| Air        | 47.39               | 34.98      | -1.504  | 0.133    |

**Supplementary Table S1b**

| Os05g23720 | Poisson Coefficient | Std. Error | z value | Pr(> z ) |
|------------|---------------------|------------|---------|----------|
| Dry        | 100                 | 0          | 0       | 0        |
| Nit        | 83.75               | 32.99      | -0.493  | 0.622    |
| Air        | 56.92               | 35.63      | -1.209  | 0.227    |

**Supplementary Table S1c**

| Os02g52860/<br>Os06g10810 | Poisson Coefficient | Std. Error | z value | Pr(> z ) |
|---------------------------|---------------------|------------|---------|----------|
| Dry                       | 100                 | 0          | 0       | 0        |
| Nit                       | 54.8                | 48.35      | -0.935  | 0.3499   |
| Air                       | -70.47              | 76.87      | -2.218  | 0.0266*  |

**Supplementary Table S1d**

| Os05g11780 | Poisson Coefficient | Std. Error | z value  | Pr(> z ) |
|------------|---------------------|------------|----------|----------|
| Dry        | 100                 | 0          | 0        | 0        |
| Nit        | 135.67              | 49.28      | 0.724    | 0.469    |
| Air        | 100                 | 53.45      | -4.2E-11 | 1        |

**Supplementary Table S1e**

| Os11g48040 | Poisson Coefficient | Std. Error | z value | Pr(> z ) |
|------------|---------------------|------------|---------|----------|
| Dry        | 100                 | 0          | 0       | 0        |
| Nit        | 151.08              | 73.03      | 0.699   | 0.484    |
| Air        | -9.9                | 115.5      | -0.951  | 0.341    |

**Supplementary Table S1f**

| Os10g42299 | Poisson Coefficient | Std. Error | z value | Pr(> z ) |
|------------|---------------------|------------|---------|----------|
| Dry        | 100                 | 0          | 0       | 0        |
| Nit        | 0                   | 0          | 0.002   | 0.998    |
| Air        | 0                   | 0          | 0.002   | 0.998    |

Poisson regression analysis of spectral counting data from dry seed, aerobic and anaerobically germinated seed. Each table is headed by the gene locus number for each protein. Poisson Coefficient, coefficient of a Poisson regression equation –  $\log(E(Y))=a+bx$ ; Std. Error, standard error; z value, standard score of Poisson distribution;  $Pr(>|z|)$ , probability of a value being  $>+z$  or  $<-z$ .

**Supplementary Table S2**

| <b>Os10g42299</b> | <b>Relative Abundance</b> | <b>Std. Error</b> | <b>T-test P=</b> |
|-------------------|---------------------------|-------------------|------------------|
| <b>Dry</b>        | 0.23                      | 0.03              | 0                |
| <b>Nit</b>        | 0.68                      | 0.04              | 0.001*           |
| <b>Air</b>        | 0.09                      | 0.02              | 0.03*            |

Student T-Test of QQQ data from dry seed, aerobic and anaerobically germinated seed for Os10g42299. Relative abundance, relative peak area; Std. Error, standard error; T-test P=probability of a value being  $>+2\sigma$  or  $<-2\sigma$ .

### Supplementary Figure S1

Arginase (Os04g01590)

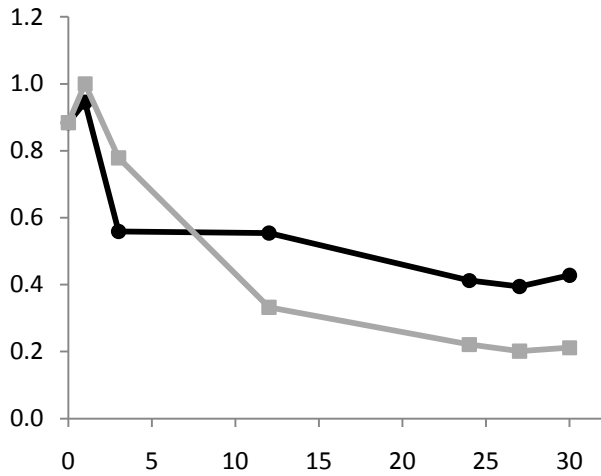

Carbamoyl-phosphate synthase large chain (Os01g38970)

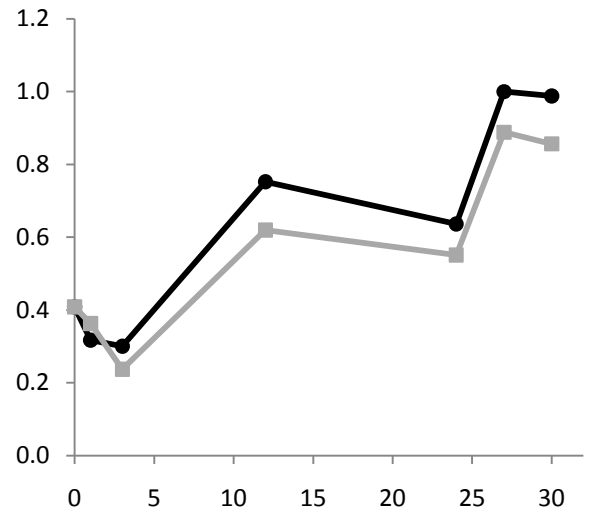

Ornithine carbamoyltransferase (Os02g47590)

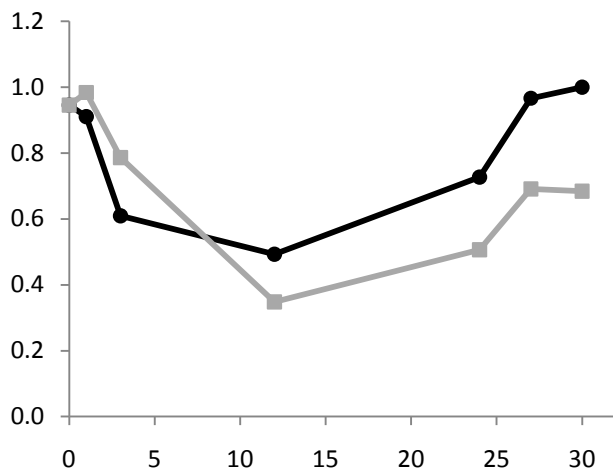

Argininosuccinate lyase (Os03g19280)

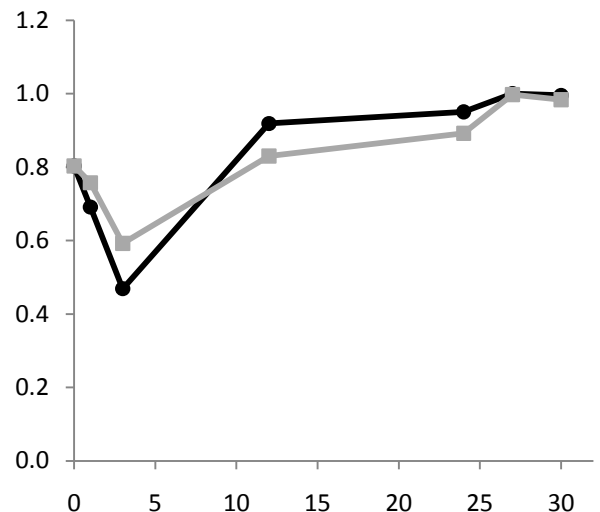

Changes in transcript abundance for genes of components of the Urea cycle from rice. Microarray data was extracted from supplemental data obtained from Narsai et al. (2009) over the time course of 0-30 hours post-imbibition. Rice seeds were germinated and embryos were rapidly dissected and grown in the same facilities and manner as described for this publication. Transcript abundance is shown relative to the highest hybridisation fluorescence for each gene across the time course under both aerobic and anaerobic conditions (mean fluorescence, n=3).
